# Supplementary material for: NAC1 Promotes Stemness and Regulates Myeloid-derived Cell Status in Triple-Negative Breast Cancer
Source: Research Square preprint supplement (doi:10.21203/rs.3.rs-3921523/v1), 2024-02-08
Supplement: Supplementary file 1 [file 9aaf80e63ff28c5686431034.docx]

**Legends to Supplementary Figures**

**Figure S1. UALCAN-TCGA shows the association of NAC1 protein expression with altered oncogenic pathways in BC samples. A)** NAC1 protein expression in BC samples is higher than in adjacent normal tissues. **B)** NAC1 protein expression is higher in the tumors with alteration of the TP53/RB pathway than in tumors without alteration of the TP53/RB pathway. **C)** Expression of NAC1 protein is higher in the tumors with c-MYC alteration than those without c-MYC alteration.

**Figure S2. Clinical relevance of NAC1 expression in breast cancer samples. A)** Association of NAC1 expression with the overall survival of patients with HER2-positive BC, as shown by analysis of the TIDE database. **B)** Association of NAC1 expression with the overall survival of patients with luminal B breast cancer, as shown by analysis of the TIDE database. **C)** Association of NAC1 expression with the overall survival of patients with luminal A breast cancer, as shown by analysis of the TIDE database. **D)** Association of NAC1 promoter methylation with the overall survival of patients with breast cancer, as shown by analysis of the TIDE database. **E)** CD44 expression in MDA-MB-231 cells with or without knockdown of NAC1, as shown by Immunofluorescence confocal microscopy. **F)** Aldolase activity in MDA-MB-231 cells with or without knockdown of NAC1.

**Figure S3. Altered gene expressions associated with NAC1 depletion in MDA-MB-231 cells.** **A)** Volcano plot of DEGs of MDA-MB-231 cells with or without depletion of NAC1. **B)** Enrichment of cancer-associated genes and pathways in NAC1-deficient versus NAC1-expressing MDA-MB-231 cells. **C-E)** Expression of genes associated with CD44 expression and TNBC tumor progression in MDA-MB-231 cells with or without knockdown of NAC1. **F)** mRNA expression of ALDH1A3 in MBA-MB-231 cells with or without knockdown of NAC1.

**Figure S4.** **Effect of NAC1 expression on TNBC metastasis.**  **A)** Lung metastasis following the intravenous injection of EO771 cells with or without depletion of NAC1. **B)** Lymph node metastasis of orthotopic MDA-MB-231 tumors. **C)** Illustration of the experimental procedure. **D)** Lung metastasis following orthotopic inoculation of EO771 cells in NAC1+/+ or NAC1-/- mice. **E)** Spontaneous lung metastasis of orthotopic MDA-MB-231 tumors with or without depletion of NAC1 in NSG mice.

**Figure S5. Analysis of DEGs in RNA seq data revealed the TFs y associated with the NAC1-induced genes.** **A)** Binding Analysis for regulation of transcription (BART) demonstrates STAT3 among highly implicated transcription factors (TFs) associated with NAC1 expression. **B)** BART reveals an association between the upregulated genes and EZH2 gene expression in the NAC1-deficient cells. **C)** BART TFs rank analysis demonstrates EZH2 as one of the top candidates in regulating NAC1-induced phenotype. **D)** Gene ontology analysis of NAC1-deficient tumor cells. **E)** Westen blot analysis of RAB6A expression in NAC1-deficient tumor cells.

**Figure S6. Comparison of tumorigenicity of NAC1-expressing and NAC1-deficient TNBC cells in nude and NSG mice. A)** Tumorigenicity of MDA-MB-231 cells in nude mice. **B)** Tumorigenicity of MDA-MB-231 cells in NSG mice. **C)** The *in vivo* limiting-dilution assay showing the tumorigenicity of MDA-MB-231 cells with or without depletion of NAC1 in NSG mice.
